# Supplementary material
Source: Springer Nature journal article supplement (https://www.springermedizin.de/resource/supplementary/13011_2011_211_MOESM1_ESM.pdf/9628624)
Supplement: MOESM1 [file 9628624]

**Titles identified by  
search strategy,  
abstract reviewed  
n = 348**

**Titles identified by  
screening references/  
hand search strategy  
n = 27**

**Excluded:  
other topic  
n = 339**

12 = addiction and violence  
5 = programs for substance  
using parents  
37 = effects of parental  
substance use  
58 = predicting development  
of SUD  
84 = general addiction  
prevention  
24 = effects of alcohol  
119 = diverse other topics

**36 studies  
for full text review**

**Excluded:  
did not meet  
inclusion criteria  
n = 23**

**13 relevant studies  
describing 9 programs  
included**
